# Supplementary material for: MicroRNA-486-3p functions as a tumor suppressor in oral cancer by targeting DDR1
Source: Springer Nature journal article supplement (doi:10.1186/s13046-019-1283-z), 2019-06-28
Supplement: 13046_2019_1283_MOESM1_ESM.pdf [file 13046_2019_1283_MOESM1_ESM.pdf]

**Table S1. Clinical pathologic characteristics of the three cohorts of OSCC**

| <b>Characteristics</b>                 | <b>Microarray cohort<br/>(n=40)</b> | <b>Validation cohort<br/>(n=46)</b> | <b>Survival cohort<br/>(n=75)</b> |
|----------------------------------------|-------------------------------------|-------------------------------------|-----------------------------------|
| <b>Age</b>                             |                                     |                                     |                                   |
| < 60                                   | 36                                  | 35                                  | 61                                |
| ≥ 60                                   | 4                                   | 11                                  | 14                                |
| <b>T stage</b>                         |                                     |                                     |                                   |
| T1                                     | 1                                   | 4                                   | 6                                 |
| T2                                     | 22                                  | 18                                  | 33                                |
| T3                                     | 9                                   | 9                                   | 17                                |
| T4                                     | 8                                   | 15                                  | 19                                |
| <b>N stage</b>                         |                                     |                                     |                                   |
| N0                                     | 23                                  | 28                                  | 46                                |
| N1                                     | 7                                   | 8                                   | 12                                |
| N2                                     | 10                                  | 10                                  | 17                                |
| <b>TNM stage</b>                       |                                     |                                     |                                   |
| I                                      | 1                                   | 3                                   | 5                                 |
| II                                     | 14                                  | 10                                  | 19                                |
| III                                    | 10                                  | 11                                  | 19                                |
| IV                                     | 15                                  | 22                                  | 32                                |
| <b>Treatment</b>                       |                                     |                                     |                                   |
| OP <sup>a</sup>                        | 17                                  | 27                                  | 40                                |
| OP+RT <sup>b</sup>                     | 17                                  | 12                                  | 23                                |
| OP+CCRT <sup>c</sup>                   | 6                                   | 7                                   | 12                                |
| <b>Perineural invasion<sup>d</sup></b> |                                     |                                     |                                   |
| No                                     | 15                                  | 24                                  | 35                                |
| Yes                                    | 25                                  | 22                                  | 40                                |
| <b>AngioLymphatic<sup>e</sup></b>      |                                     |                                     |                                   |
| No                                     | 22                                  | 26                                  | 41                                |
| Yes                                    | 18                                  | 20                                  | 34                                |
| <b>Recurrence status</b>               |                                     |                                     |                                   |
| No                                     | 30                                  | 30                                  | 53                                |
| Yes                                    | 10                                  | 16                                  | 22                                |

<sup>a</sup>OP, operation; <sup>b</sup>OP+RT, operation plus radiotherapy; <sup>c</sup>CCRT, concurrent chemoradiotherapy;

<sup>d</sup>perineural invasion refers to the invasion of cancer to the space surrounding a nerve refers to the invasion of cancer to the space surrounding a nerve; <sup>e</sup>Angiolymphatic invasion means that cancer was found in the blood vessels and lymph vessels.

**Table S2. shRNA clone\* target sequence used in this study.**

| <b>Name</b> | <b>Clone ID</b> | <b>Target Sequence (5'-3')</b> |
|-------------|-----------------|--------------------------------|
| Control     | TRC001          | pLKO.1-base empty vector       |
| shDDR1-D1   | TRCN0000121163  | TGCTGACATGAAGGGACATTT          |
| shDDR1-A1   | TRCN0000121086  | GCAGGTCCACTGTAACAACAT          |

**\*Purchased from the National RNAi Core Facility (Academia Sinica, Taipei, Taiwan)**

**Table S3. Primers sequence used in this study.**

| <b>Primer name</b>         | <b>Sequence (5'-3')</b>                                  |
|----------------------------|----------------------------------------------------------|
| <i>For gene expression</i> |                                                          |
| ANK1 (F)                   | GGCCCGCAACGACGACACG                                      |
| ANK1 (R)                   | AATGTGCAGGGGCGTGAATC                                     |
| DDR1 (F)                   | CATGAGCCGGAACCTCTA                                       |
| DDR1 (R)                   | CCACAGGGTCACACCAA                                        |
| GAPDH (F)                  | GAAGGTGAAGGTCGGAGT                                       |
| GAPDH (R)                  | GAAGATGGTGATGGGATTTC                                     |
| <i>For MSP</i>             |                                                          |
| ANK1-M (F)                 | GAGCGTTCGGTTCGATAG                                       |
| ANK1-M (R)                 | TACGAAACCTATAACGTACG                                     |
| ANK1-U (F)                 | GGGAGTGTTTGGTTTGATAGT                                    |
| ANK1-U (R)                 | CTCTACAAAACCTATAACATACA                                  |
| <i>For ChIP</i>            |                                                          |
| ANK1 (F)                   | CTCTTGTAATCTGCGGTCC                                      |
| ANK1 (R)                   | GGGGCCTGTGACGTG                                          |
| <i>For miRNA</i>           |                                                          |
| Universal reverse          | GTGCAGGGTCCGAGGT                                         |
| miR-486-3p (RT)            | GTTGGCTCTGGTGCAGGGTCCGAGGTATTTCGCA<br>CCAGAGC CAACATCCTG |
| miR-486-3p (F)             | GCGGGGCAGCTCAGTA                                         |
| RNU44 (RT)                 | GTTGGCTCTGGTGCAGGGTCCGAGGTATTTCGCA<br>CCAGAGCCAACAGTCAG  |
| RNU44 (F)                  | GCCCTGGATGATGATAGCAA                                     |

**F, forward; R, reverse; RT, primer sequence for reverse transcription**

**Table S4. Correlation of the DDR1 expression with clinicopathological factors in 40 OSCC patients (n=40)**

| Characteristics                  | DDR1 RNA expression |             | <i>p</i> value <sup>#</sup> |
|----------------------------------|---------------------|-------------|-----------------------------|
|                                  | Low (n=17)          | High (n=23) |                             |
| Age                              |                     |             |                             |
| Years (mean ± SD)                | 48±8.3              | 50±9.7      | 0.5278                      |
| Stage                            |                     |             | 0.0829                      |
| I+II                             | 9                   | 6           |                             |
| III+IV                           | 8                   | 17          |                             |
| Tumor status                     |                     |             | 0.1500                      |
| T1-2                             | 12                  | 11          |                             |
| T3-4                             | 5                   | 12          |                             |
| Lymph node status                |                     |             | <b>0.0369*</b>              |
| N0                               | 13                  | 10          |                             |
| N1-N3                            | 4                   | 13          |                             |
| Perineural invasion <sup>a</sup> |                     |             | <b>0.0166*</b>              |
| No                               | 10                  | 5           |                             |
| Yes                              | 7                   | 18          |                             |
| AngioLymphatic <sup>b</sup>      |                     |             | <b>0.0091**</b>             |
| No                               | 13                  | 8           |                             |
| Yes                              | 4                   | 15          |                             |
| Recurrence status                |                     |             | 0.3558                      |
| No                               | 14                  | 16          |                             |
| Yes                              | 3                   | 7           |                             |

<sup>#</sup>*p* value for age was derived from a two-tailed Student's *t* test. SD represents standard deviation; other *p* values were derived with a two-tailed Pearson chi-square test. \**p* < 0.05; \*\**p* < 0.01.

<sup>a</sup>perineural invasion refers to the invasion of cancer to the space surrounding a nerve; <sup>b</sup>Angiolymphatic invasion means that cancer was found in the blood vessels and lymph vessels.

**Table S5. Cox univariate and multivariate regression analysis of DDR1 and prognostic factors for overall survival in microarray cohort (n=40)**

| Variables                    | Univariate  |         | Multivariate |         |
|------------------------------|-------------|---------|--------------|---------|
|                              | coefficient | p-value | coefficient  | p-value |
| Age                          | 0.01506     | 0.62    | 0.02408      | 0.49    |
| TNM stage (I+II vs. III+ IV) | 0.4372      | 0.46    | 0.64728      | 0.377   |
| Treatment (Op only vs. Op +) | -0.09291    | 0.863   | -0.39764     | 0.515   |
| DDR1                         | 0.5534      | 0.463   | 0.37662      | 0.665   |

Op +, Op +RT or Op + CCRT

**Table S5. Cox univariate and multivariate regression analysis of DDR1 and prognostic factors for overall survival in validation cohort (n=46)**

| Variables                    | Univariate  |         | Multivariate |         |
|------------------------------|-------------|---------|--------------|---------|
|                              | coefficient | p-value | coefficient  | p-value |
| Age                          | -0.0056     | 0.823   | -0.01186     | 0.658   |
| TNM stage (I+II vs. III+ IV) | 0.5116      | 0.367   | 0.39174      | 0.578   |
| Treatment (Op only vs. Op +) | 0.4730      | 0.317   | 0.30965      | 0.594   |
| DDR1                         | -0.0085     | 0.984   | -0.01825     | 0.968   |

Op +, Op +RT or Op + CCRT

**Table S7. Cox univariate and multivariate regression analysis of DDR1 and prognostic factors for overall survival in survival analysis cohort (n=75)**

| Variables                    | Univariate  |                | Multivariate |                |
|------------------------------|-------------|----------------|--------------|----------------|
|                              | coefficient | p-value        | coefficient  | p-value        |
| Age                          | 0.0171      | 0.403          | 0.007767     | 0.718          |
| TNM stage (I+II vs. III+ IV) | 0.6729      | 0.149          | 0.834273     | 0.1236         |
| Treatment (Op only vs. Op +) | 0.1877      | 0.632          | -0.299162    | 0.5128         |
| DDR1 (low vs. high)          | 0.8499      | <b>0.0307*</b> | 0.90453      | <b>0.0273*</b> |

**Op +, Op +RT or Op + CCRT**

**\*Two-sided Cox proportional hazards regression using normal approximation and  $p < 0.05$  was considered statistically significant.**
